# Supplementary material for: Antibiotic Use before, during, and after Seeking Care for Acute Febrile Illness at a Hospital Outpatient Department: A Cross-Sectional Study from Rural India
Source: MDPI journal article supplement (doi:10.3390/antibiotics11050574), 2022-04-25
Supplement: s1 [file s1]

## Supplementary File

Table S1. WHO ATC classification, AWaRe category, oral and parenteral Defined Daily Doses (DDDs).

| Antibiotic Chemical Subgroup         | ATC code        | Antibiotic Type                          | AWaRe Category  | DDDs        |                 |
|--------------------------------------|-----------------|------------------------------------------|-----------------|-------------|-----------------|
|                                      |                 |                                          |                 | Oral<br>g   | Parenteral<br>g |
| Intestinal antibiotics               | A07AA11         | Rifaximin                                | Watch           | 0.6         | -               |
| Tetracyclines                        | J01AA02         | Doxycycline                              | Access          | 0.1         | 0.1             |
| Penicillins with extended spectrum   | J01CA04         | Amoxicillin                              | Access          | 1.5         | 3               |
| Combinations of penicillins*         | J01CR02         | Amoxicillin and clavulanic acid          | Access          | 1.5         | 3               |
| Second-generation cephalosporins     | J01DC02         | Cefuroxime                               | Watch           | 0.5         | 3               |
| Third-generation cephalosporins      | J01DD01         | Cefotaxime                               | Watch           | -           | 4               |
|                                      | J01DD02         | Ceftazidime                              | Watch           | -           | 4               |
|                                      | J01DD04         | Ceftriaxone                              | Watch           | -           | 2               |
|                                      | J01DD08         | Cefixime                                 | Watch           | 0.4         | -               |
|                                      | J01DD13         | Cefpodoxime                              | Watch           | 0.4         | -               |
|                                      | J01DD64         | Cefpodoxime proxetil and clavulanic acid | Not recommended | 0.4         | -               |
| Monobactams                          | J01DF01         | Aztreonam                                | Reserve         | -           | 4               |
| Macrolides                           | J01FA10         | Azithromycin                             | Watch           | -           | 0.5             |
| Aminoglycosides                      | J01GB03         | Gentamicin                               | Access          | -           | 0.24            |
| Fluoroquinolones                     | J01MA01         | Ofloxacin                                | Watch           | 0.4         | 0.4             |
|                                      | J01MA02         | Ciprofloxacin                            | Watch           | 1           | 0.8             |
|                                      | J01MA06         | Norfloxacin                              | Watch           | 0.8         | -               |
|                                      | J01MA12         | Levofloxacin                             | Watch           | 0.5         | 0.5             |
| Combinations of antibacterials       | J01RA09         | Ofloxacin and ornidazole                 | Not recommended | 2 UD=2 tabs | -               |
|                                      | J01RA13         | Norfloxacin and tinidazole               | Unclassified    | 2 UD=2 tabs | -               |
|                                      | J01RAXX         | Cefixime and azithromycin                | Not recommended | 2 UD=2 tabs | -               |
| Glycopeptide antibacterials          | J01XA01         | Vancomycin                               | Watch           | -           | 2               |
| Imidazole/Nitroimidazole derivatives | J01XD01/P01AB01 | Metronidazole                            | Access          | 2           | 1.5             |
| Nitrofuran derivatives               | J01XE01         | Nitrofurantoin                           | Access          | 0.2         | -               |

\*including  $\beta$ -lactamase inhibitors

Supplementary File

Table S2. Distribution of patient reported antibiotic use before outpatient visit across age groups in years, according to the WHO AWaRe classification by encounters and percentage.

| AWaRe Category  | <5 (n=17) |       | 5-17 (n=8) |       | 18-34 (n=36) |       | 35-49 (n=13) |       | 50-65 (n=9) |       | Total (n=83) |        |
|-----------------|-----------|-------|------------|-------|--------------|-------|--------------|-------|-------------|-------|--------------|--------|
|                 | n         | %     | n          | %     | n            | %     | n            | %     | n           | %     | n            | %      |
| Access          | 5.0       | 29.4% | 4.0        | 50.0% | 7.0          | 19.4% | 3.0          | 23.1% | 2.0         | 22.2% | 21.0         | 25.3%  |
| Watch           | 10.0      | 58.8% | 4.0        | 50.0% | 29.0         | 80.6% | 10.0         | 76.9% | 7.0         | 77.8% | 60.0         | 72.3%  |
| Reserve         | -         | -     | -          | -     | -            | -     | -            | -     | -           | -     | -            | -      |
| Not recommended | 2.0       | 11.8% | -          | -     | -            | -     | -            | -     | -           | -     | 2.0          | 2.4%   |
| Unclassified    | -         | -     | -          | -     | -            | -     | -            | -     | -           | -     | -            | -      |
| Total           | 17.0      |       | 8.0        |       | 36.0         |       | 13.0         |       | 9.0         |       | 83.0         | 100.0% |

Table S3. Distribution of patient reported antibiotic prescription during outpatient visit across age groups in years, according to the WHO AWaRe classification by encounters and percentage.

| AWaRe Category  | <5 (n=38) |       | 5-17 (n=64) |       | 18-34 (n=134) |       | 35-49 (n=49) |       | 50-65 (n=28) |       | Total (n=313) |        |
|-----------------|-----------|-------|-------------|-------|---------------|-------|--------------|-------|--------------|-------|---------------|--------|
|                 | n         | %     | n           | %     | n             | %     | n            | %     | n            | %     | n             | %      |
| Access          | 9.0       | 23.7% | 27.0        | 42.2% | 66.0          | 49.3% | 25.0         | 51.0% | 15.0         | 53.6% | 142.0         | 45.4%  |
| Watch           | 28.0      | 73.7% | 37.0        | 57.8% | 64.0          | 47.8% | 24.0         | 49.0% | 12.0         | 42.9% | 165.0         | 52.7%  |
| Reserve         | -         | -     | -           | -     | 1.0           | 0.7%  | -            | -     | -            | -     | 1.0           | 0.3%   |
| Not recommended | 1.0       | 2.6%  | -           | -     | 2.0           | 1.5%  | -            | -     | 1.0          | 3.6%  | 4.0           | 1.3%   |
| Unclassified    | -         | -     | -           | -     | 1.0           | 0.7%  | -            | -     | -            | -     | 1.0           | 0.3%   |
| Total           | 38.0      |       | 64.0        |       | 134.0         |       | 49.0         |       | 28.0         |       | 313.0         | 100.0% |

Table S4. Distribution of patient reported antibiotic use after outpatient visit across age groups in years, according to the WHO AWaRe classification by encounters and percentage.

| AWaRe Category  | <5 (n=11) |       | 5-17 (n=27) |       | 18-34 (n=36) |       | 35-49 (n=13) |       | 50-65 (n=2) |        | Total (n=89) |        |
|-----------------|-----------|-------|-------------|-------|--------------|-------|--------------|-------|-------------|--------|--------------|--------|
|                 | n         | (%)   | n           | %     | n            | %     | n            | %     | n           | %      | n            | %      |
| Access          | 2.0       | 18.2% | 13.0        | 48.1% | 10.0         | 27.8% | 4.0          | 30.8% | -           | -      | 29.0         | 32.6%  |
| Watch           | 9.0       | 81.8% | 13.0        | 48.1% | 25.0         | 69.4% | 8.0          | 61.5% | 2.0         | 100.0% | 57.0         | 64.0%  |
| Reserve         | -         | -     | -           | -     | -            | -     | -            | -     | -           | -      | -            | -      |
| Not recommended | -         | -     | -           | -     | -            | -     | -            | -     | -           | -      | -            | -      |
| Unclassified    | -         | -     | 1.0         | 3.7%  | 1.0          | 2.8%  | 1.0          | 7.7%  | -           | -      | 3.0          | 3.4%   |
| Total           | 11.0      |       | 27.0        |       | 36.0         |       | 13.0         |       | 2.0         |        | 89.0         | 100.0% |

## Supplementary File

Table S5. Distribution of patient reported antibiotic use before outpatient visit by age groups in years and WHO ATC class in Defined Daily Doses (DDD).

| Antibiotic Chemical Subgroup         | Antibiotic Type                          | <5 (n=17) |       | 5-17 (n=8) |       | 18-34 (n=36) |       | 35-49 (n=13) |       | 50-65 (n=9) |       | Total (n=83) |       |
|--------------------------------------|------------------------------------------|-----------|-------|------------|-------|--------------|-------|--------------|-------|-------------|-------|--------------|-------|
|                                      |                                          | DDD       | %     | DDD        | %     | DDD          | %     | DDD          | %     | DDD         | %     | DDD          | %     |
| Intestinal antibiotics               | Rifaximin                                | -         | -     | -          | -     | -            | -     | -            | -     | -           | -     | -            | -     |
| Tetracyclines                        | Doxycycline                              | -         | -     | -          | -     | 18.0         | 13.6% | 8.0          | 22.1% | 2.0         | 8.2%  | 28.0         | 12.0% |
| Penicillins with extended spectrum   | Amoxycillin                              | 1.9       | 8.5%  | -          | -     | 5.0          | 3.8%  | 2.5          | 6.9%  | 2.0         | 8.2%  | 11.4         | 4.9%  |
| Combinations of penicillins*         | Amoxycillin and clavulanic acid          | 1.7       | 7.5%  | 7.2        | 35.9% | 5.1          | 3.8%  | 0.8          | 2.3%  | -           | -     | 14.8         | 6.3%  |
| Second-generation cephalosporins     | Cefuroxime                               | -         | -     | -          | -     | 1.6          | 1.2%  | -            | -     | -           | -     | 1.6          | 0.7%  |
| Third-generation cephalosporin       | Cefotaxime                               | -         | -     | -          | -     | -            | -     | 0.5          | 1.4%  | 0.5         | -     | 0.5          | 0.2%  |
|                                      | Ceftazidime                              | -         | -     | -          | -     | -            | -     | -            | -     | -           | -     | -            | -     |
|                                      | Ceftriaxone                              | -         | -     | 5.3        | 26.4% | -            | -     | -            | -     | -           | -     | 5.3          | 2.2%  |
|                                      | Cefixime                                 | 0.5       | 2.2%  | 1.0        | 5.0%  | 27.0         | 20.4% | 4.0          | 11.0% | 3.0         | 12.4% | 35.5         | 15.2% |
|                                      | Cefpodoxime                              | 3.3       | 14.4% | -          | -     | 8.0          | 6.1%  | -            | -     | -           | -     | 11.3         | 4.8%  |
|                                      | Cefpodoxime proxetil and clavulanic acid | 2.0       | 8.9%  | -          | -     | -            | -     | -            | -     | -           | -     | 2.0          | 0.9%  |
| Monobactams                          | Aztreonam                                | -         | -     | -          | -     | -            | -     | -            | -     | -           | -     | -            | -     |
| Macrolides                           | Azithromycin                             | 4.7       | 20.7% | 2.5        | 12.6% | 22.5         | 17.0% | 3.3          | 9.2%  | 2.0         | 8.2%  | 35.0         | 15.0% |
| Aminoglycosides                      | Gentamicin                               | -         | -     | -          | -     | -            | -     | -            | -     | -           | -     | -            | -     |
| Fluoroquinolones                     | Ofloxacin                                | 3.5       | 15.6% | -          | -     | 18.0         | 13.6% | 3.0          | 8.3%  | 3.0         | 12.4% | 27.5         | 11.8% |
|                                      | Ciprofloxacin                            | -         | -     | -          | -     | 26.1         | 19.7% | 14.0         | 38.7% | 2.0         | 8.2%  | 42.1         | 18.0% |
|                                      | Norfloxacin                              | -         | -     | -          | -     | -            | -     | -            | -     | 6.0         | 24.7% | 6.0          | 2.6%  |
|                                      | Levofloxacin                             | -         | -     | 4.0        | 20.1% | -            | -     | -            | -     | 4.0         | 16.5% | 8.0          | 3.4%  |
| Combinations of antibacterials       | Ofloxacin and ornidazole                 | 5.0       | 22.2% | -          | -     | -            | -     | -            | -     | -           | -     | 5.0          | 2.1%  |
|                                      | Norfloxacin and tinidazole               | -         | -     | -          | -     | -            | -     | -            | -     | -           | -     | -            | -     |
|                                      | Cefixime and azithromycin                | -         | -     | -          | -     | -            | -     | -            | -     | -           | -     | -            | -     |
| Glycopeptide antibacterials          | Vancomycin                               | -         | -     | -          | -     | -            | -     | -            | -     | -           | -     | -            | -     |
| Imidazole/Nitroimidazole derivatives | Metronidazole                            | -         | -     | -          | -     | 0.4          | 0.3%  | -            | -     | -           | -     | 0.4          | 0.2%  |
| Nitrofuran derivatives               | Nitrofurantoin                           | -         | -     | -          | -     | -            | -     | -            | -     | -           | -     | -            | -     |
| Total                                |                                          | 22.5      |       | 19.9       |       | 131.6        |       | 36.2         |       | 24.5        |       | 234.2        | 100%  |

\*including  $\beta$ -lactamase inhibitors

## Supplementary File

Table S6. Distribution of antibiotic prescription at outpatient visit across age groups in years and WHO ATC class in Defined Daily Doses (DDD).

| Antibiotic Chemical Subgroup         | Antibiotic Type                          | <5 (n=38) |       | 5-17 (n=64) |       | 18-34 (n=134) |       | 35-49 (n=49) |       | 50-65 (n=28) |       | Total (n=313) |       |
|--------------------------------------|------------------------------------------|-----------|-------|-------------|-------|---------------|-------|--------------|-------|--------------|-------|---------------|-------|
|                                      |                                          | DDD       | %     | DDD         | %     | DDD           | %     | DDD          | %     | DDD          | %     | DDD           | %     |
| Intestinal antibiotics               | Rifaximin                                | -         | -     | -           | -     | -             | -     | -            | -     | -            | -     | -             | -     |
| Tetracyclines                        | Doxycycline                              | -         | -     | -           | -     | 202.0         | 26.9% | 48.0         | 19.8% | 26.0         | 21.3% | 276.0         | 19.5% |
| Penicillins with extended spectrum   | Amoxycillin                              | 0.5       | 0.5%  | -           | -     | -             | -     | -            | -     | -            | -     | 0.5           | 0.0%  |
| Combinations of penicillins*         | Amoxycillin and clavulanic acid          | 7.8       | 7.7%  | 45.7        | 21.9% | 157.3         | 20.9% | 68.8         | 28.4% | 35.3         | 28.9% | 314.9         | 22.3% |
| Second-generation cephalosporins     | Cefuroxime                               | -         | -     | -           | -     | 2.4           | 0.3%  | 6.0          | 2.5%  | -            | -     | 8.4           | 0.6%  |
| Third-generation cephalosporins      | Cefotaxime                               | -         | -     | -           | -     | 2.2           | 0.3%  | 1.8          | 0.7%  | 2.5          | 2.0%  | 6.5           | 0.5%  |
|                                      | Ceftazidime                              | -         | -     | -           | -     | -             | -     | 0.4          | 0.2%  | -            | -     | 0.4           | -     |
|                                      | Ceftriaxone                              | 0.3       | 0.3%  | -           | -     | 5.0           | 0.7%  | 1.0          | 0.4%  | -            | -     | 6.3           | 0.4%  |
|                                      | Cefixime                                 | 20.4      | 20.2% | 54.5        | 26.2% | 57.5          | 7.7%  | 5.5          | 2.3%  | 7.5          | 6.1%  | 145.4         | 10.3% |
|                                      | Cefpodoxime                              | 1.3       | 1.2%  | -           | -     | 8.0           | 1.1%  | 8.1          | 3.4%  | -            | -     | 17.4          | 1.2%  |
|                                      | Cefpodoxime proxetil and clavulanic acid | -         | -     | -           | -     | 7.5           | 1.0%  | -            | -     | -            | -     | 7.5           | 0.5%  |
| Monobactams                          | Aztreonam                                | -         | -     | -           | -     | 0.8           | 0.1%  | -            | -     | -            | -     | 0.8           | -     |
| Macrolides                           | Azithromycin                             | 54.7      | 54.1% | 100.0       | 48.0% | 188.0         | 25.0% | 43.4         | 17.9% | 5.0          | 4.1%  | 391.1         | 27.7% |
| Aminoglycosides                      | Gentamicin                               | -         | -     | -           | -     | -             | -     | -            | -     | -            | -     | 0.0           | 0.0%  |
| Fluoroquinolones                     | Ofloxacin                                | 5.5       | 5.4%  | 7.0         | 3.4%  | 6.0           | 0.8%  | 2.5          | 1.0%  | -            | -     | 21.0          | 1.5%  |
|                                      | Ciprofloxacin                            | -         | -     | -           | -     | 37.0          | 4.9%  | 26.1         | 10.8% | 8.6          | 7.0%  | 71.7          | 5.1%  |
|                                      | Norfloxacin                              | -         | -     | -           | -     | 21.0          | 2.8%  | 9.0          | 3.7%  | 24.5         | 20.0% | 54.5          | 3.9%  |
|                                      | Levofloxacin                             | 3.0       | 3.0%  | -           | -     | -             | -     | -            | -     | -            | -     | 3.0           | 0.2%  |
| Combinations of antibacterials       | Ofloxacin and ornidazole                 | 5.0       | 5.0%  | -           | -     | -             | -     | -            | -     | 5.0          | 4.1%  | 10.0          | 0.7%  |
|                                      | Norfloxacin and tinidazole               | -         | -     | -           | -     | 3.0           | 0.4%  | -            | -     | -            | -     | 3.0           | 0.2%  |
|                                      | Cefixime and azithromycin                | -         | -     | -           | -     | 5.0           | 0.7%  | -            | -     | -            | -     | 5.0           | -     |
| Glycopeptide antibacterials          | Vancomycin                               | 1.1       | 1.1%  | -           | -     | -             | -     | -            | -     | -            | -     | 1.1           | 0.1%  |
| Imidazole/Nitroimidazole derivatives | Metronidazole                            | 1.5       | 1.5%  | 1.2         | 0.6%  | 38.2          | 5.1%  | 18.8         | 7.8%  | 7.8          | 6.4%  | 67.5          | 4.8%  |
| Nitrofurantoin derivatives           | Nitrofurantoin                           | -         | -     | -           | -     | 10.5          | 1.4%  | 3.0          | 1.2%  | -            | -     | 13.5          | 1.0%  |
| Total                                |                                          | 101.0     |       | 208.4       |       | 751.3         |       | 242.4        |       | 122.2        |       | 1425.3        | 100%  |

\*including  $\beta$ -lactamase inhibitors

## Supplementary File

Table S7. Distribution of patient reported antibiotic use after outpatient visit across age groups in years and WHO ATC class in Defined Daily Doses (DDD).

| Antibiotic Chemical Subgroup         | Antibiotic Type                          | <5 (n=11) |       | 5-17 (n=27) |       | 18-34 (n=36) |       | 35-49 (n=13) |       | 50-65 (n=2) |       | Total (n=89) |       |
|--------------------------------------|------------------------------------------|-----------|-------|-------------|-------|--------------|-------|--------------|-------|-------------|-------|--------------|-------|
|                                      |                                          | DDD       | %     | DDD         | %     | DDD          | %     | DDD          | %     | DDD         | %     | DDD          | %     |
| Intestinal antibiotics               | Rifaximin                                | -         | -     | -           | -     | 6.7          | 3.2%  | -            | -     | -           | -     | 6.7          | 1.7%  |
| Tetracyclines                        | Doxycycline                              | -         | -     | -           | -     | -            | -     | -            | -     | -           | -     | -            | -     |
| Penicillins with extended spectrum   | Amoxycillin                              | -         | -     | 1.0         | 1.5%  | 3.3          | 1.6%  | -            | -     | -           | -     | 4.3          | 1.1%  |
| Combinations of penicillins*         | Amoxycillin and clavulanic acid          | 1.5       | 4.2%  | 20.0        | 30.0% | 22.5         | 10.8% | 12.5         | 21.9% | -           | -     | 56.5         | 14.3% |
| Second-generation cephalosporins     | Cefuroxime                               | -         | -     | -           | -     | -            | -     | -            | -     | -           | -     | -            | -     |
| Third-generation cephalosporins      | Cefotaxime                               | 3.8       | 10.6% | -           | -     | 3.8          | 1.8%  | -            | -     | -           | -     | 7.5          | 1.9%  |
|                                      | Ceftazidime                              | -         | -     | -           | -     | -            | -     | -            | -     | -           | -     | -            | -     |
|                                      | Ceftriaxone                              | -         | -     | -           | -     | -            | -     | -            | -     | -           | -     | -            | -     |
|                                      | Cefixime                                 | -         | -     | 17.5        | 26.2% | 6.0          | 2.9%  | 6.0          | 10.5% | 3.0         | 50.0% | 32.5         | 8.2%  |
|                                      | Cefpodoxime                              | 3.1       | 8.9%  | -           | -     | -            | -     | -            | -     | -           | -     | 3.1          | 0.8%  |
|                                      | Cefpodoxime proxetil and clavulanic acid | -         | -     | -           | -     | -            | -     | -            | -     | -           | -     | -            | -     |
| Monobactams                          | Aztreonam                                | -         | -     | -           | -     | -            | -     | -            | -     | -           | -     | -            | -     |
| Macrolides                           | Azithromycin                             | 12.5      | 35.4% | 25.8        | 38.7% | 132.3        | 63.8% | 25.0         | 43.9% | -           | -     | 195.7        | 49.6% |
| Aminoglycosides                      | Gentamicin                               | 3.4       | 9.7%  | -           | -     | -            | -     | -            | -     | -           | -     | 3.4          | 0.9%  |
| Fluoroquinolones                     | Ofloxacin                                | 5.0       | 14.2% | -           | -     | 7.5          | 3.6%  | -            | -     | -           | -     | 12.5         | 3.2%  |
|                                      | Ciprofloxacin                            | -         | -     | 2.4         | 3.6%  | 20.7         | 10.1% | 3.0          | 5.3%  | 3.0         | 50.0% | 29.1         | 7.4%  |
|                                      | Norfloxacin                              | -         | -     | -           | -     | 4.5          | 2.2%  | 10.5         | 18.4% | -           | -     | 15.0         | 3.8%  |
|                                      | Levofloxacin                             | 9.8       | 17.0% | -           | -     | -            | -     | -            | -     | -           | -     | 9.8          | 2.5%  |
| Combinations of antibacterials       | Ofloxacin and ornidazole                 | -         | -     | -           | -     | -            | -     | -            | -     | -           | -     | -            | -     |
|                                      | Norfloxacin and tinidazole               | -         | -     | 4.0         | -     | 4.0          | -     | 3.0          | -     | -           | -     | 11.0         | 2.8%  |
|                                      | Cefixime and azithromycin                | -         | -     | -           | -     | -            | -     | -            | -     | -           | -     | -            | -     |
| Glycopeptide antibacterials          | Vancomycin                               | -         | -     | -           | -     | -            | -     | -            | -     | -           | -     | -            | -     |
| Imidazole/Nitroimidazole derivatives | Metronidazole                            | -         | -     | 0.6         | -     | 3.0          | -     | 3.8          | -     | -           | -     | 7.4          | 1.9%  |
| Nitrofuran derivatives               | Nitrofurantoin                           | -         | -     | -           | -     | -            | -     | -            | -     | -           | -     | -            | -     |
| Total                                |                                          | 39.1      |       | 71.4        |       | 214.3        |       | 63.8         |       | 6.0         |       | 394.5        | 100%  |

\*including  $\beta$ -lactamase inhibitors

## Supplementary File

Table S8. Distribution of antibiotic encounters for all 1000 patients by presumptive diagnosis and AWaRe category, in encounters and percentages.

| AWaRe Category  | Presumptive diagnosis |       |             |       |             |       |             |       |                |       |                |       |                |       |               |       | Total (n=1000) |       |
|-----------------|-----------------------|-------|-------------|-------|-------------|-------|-------------|-------|----------------|-------|----------------|-------|----------------|-------|---------------|-------|----------------|-------|
|                 | AVI (n=601)           |       | UTI (n=117) |       | URTI (n=92) |       | LRTI (n=58) |       | Gastro. (n=58) |       | Typhoid (n=40) |       | Malaria (n=15) |       | Other* (n=19) |       |                |       |
|                 | n                     | %     | n           | %     | n           | %     | n           | %     | n              | %     | n              | %     | n              | %     | n             | %     | n              | %     |
| Access          | 50.0                  | 8.3%  | 34.0        | 29.1% | 22.0        | 23.9% | 13.0        | 22.4% | 10.0           | 17.2% | 6.0            | 15.0% | 5.0            | 33.3% | 2.0           | 10.5% | 143.5          | 14.3% |
| Watch           | 79.0                  | 13.1% | 28.0        | 23.9% | 17.0        | 18.5% | 13.0        | 22.4% | 11.0           | 19.0% | 10.0           | 25.0% | 2.0            | 13.3% | 5.0           | 26.3% | 166.4          | 16.6% |
| Reserve         | 1.0                   | 0.2%  | -           | -     | -           | -     | -           | -     | -              | -     | -              | -     | -              | -     | -             | -     | 1.0            | -     |
| Not recommended | 2.0                   | 0.3%  | -           | -     | 1.0         | 1.1%  | -           | -     | 1.0            | 1.7%  | -              | -     | -              | -     | -             | -     | 4.0            | -     |
| Unclassified    | -                     | -     | 1.0         | 0.9%  | -           | -     | -           | -     | -              | -     | -              | -     | -              | -     | -             | -     | 1.0            | -     |
| Sub-total AWaRe | 132.0                 | 22.0% | 63.0        | 53.8% | 40.0        | 43.5% | 26.0        | 44.8% | 22.0           | 37.9% | 16.0           | 40.0% | 7.0            | 46.7% | 7.0           | 36.8% | 313.0          | 31.3% |
| No antibiotics  | 469                   | 78.0% | 54.0        | 46.2% | 52.0        | 56.5% | 32.0        | 55.2% | 36.0           | 62.1% | 24.0           | 41.4% | 8.0            | 53.3% | 12.0          | 63.2% | 687.0          | 68.7% |

AVI-Acute viral illness, UTI-urinary tract infection, URTI-Upper respiratory tract infection, LRTI-Lower respiratory tract infection, Gastro.-gastroenteritis, Other includes tuberculosis, appendicitis, severe acute malnutrition, rheumatic heart disease, abscess and septic arthritis. \*including  $\beta$ -lactamase inhibitors

## Supplementary File

Table S9. Distribution of antibiotics for all patients prescribed antibiotics at outpatient visit by presumptive diagnosis and ATC class in defined daily doses (DDDs).

| Antibiotic Chemical Subgroup         | Antibiotic Type                     | AVI<br>(n=132) |       | UTI<br>(n=63) |       | URTI<br>(n=40) |       | LRTI<br>(n=26) |       | Gastro.<br>(n=22) |       | Typhoid<br>(n=16) |       | Malaria<br>(n=7) |       | Other<br>(n=7) |       | Total<br>(n=313) |        |
|--------------------------------------|-------------------------------------|----------------|-------|---------------|-------|----------------|-------|----------------|-------|-------------------|-------|-------------------|-------|------------------|-------|----------------|-------|------------------|--------|
|                                      |                                     | DDD            | %     | DDD           | %     | DDD            | %     | DDD            | %     | DDD               | %     | DDD               | %     | DDD              | %     | DDD            | %     | DDD              | %      |
| Intestinal antibiotics               | Rifaximin                           | -              | -     | -             | -     | -              | -     | -              | -     | -                 | -     | -                 | -     | -                | -     | -              | -     | 0.0              | 0.0%   |
| Tetracyclines                        | Doxycycline                         | 112.0          | 17.4% | 92.0          | 30.4% | 20.0           | 12.2% | -              | -     | 20.0              | 25.0% | 24.0              | 26.8% | 2.0              | 9.6%  | 6.0            | 15.3% | 276.0            | 19.5%  |
| Penicillins with extended spectrum   | Amoxycillin                         | 0.5            | 0.1%  | -             | -     | -              | -     | -              | -     | -                 | -     | -                 | -     | -                | -     | -              | -     | 0.5              | 0.0%   |
| Combinations of penicillins*         | Amoxycillin and clavulanic acid     | 118.5          | 18.5% | 57.8          | 19.1% | 63.7           | 38.9% | 34.8           | 40.1% | 13.7              | 17.1% | 6.1               | 6.8%  | 11.7             | 55.8% | 8.8            | 22.4% | 314.9            | 22.3%  |
| Second-generation cephalosporins     | Cefuroxime                          | 2.4            | 0.4%  | -             | -     | -              | -     | -              | -     | -                 | -     | 6.0               | 6.7%  | -                | -     | -              | -     | 8.4              | 0.6%   |
| Third-generation cephalosporins      | Cefotaxime                          | 2.7            | 0.4%  | -             | -     | 3.8            | 2.3%  | -              | -     | -                 | -     | -                 | -     | -                | -     | -              | -     | 6.4              | 0.5%   |
|                                      | Ceftazidime                         | 0.4            | 0.1%  | -             | -     | -              | -     | -              | -     | -                 | -     | -                 | -     | -                | -     | -              | -     | 0.4              | 0.0%   |
|                                      | Ceftriaxone                         | 3.0            | 0.5%  | -             | -     | -              | -     | -              | -     | 0.3               | 0.3%  | -                 | -     | -                | -     | 3.0            | 7.7%  | 6.3              | 0.4%   |
|                                      | Cefixime                            | 50.5           | 7.9%  | 40.5          | 13.4% | 7.1            | 4.4%  | 5.5            | 6.4%  | 6.0               | 7.5%  | 18.8              | 20.9% | 6.0              | 28.7% | 11.0           | 28.1% | 145.4            | 10.3%  |
|                                      | Cefpodoxime                         | 12.4           | 1.9%  | 5.0           | 1.6%  | -              | -     | -              | -     | -                 | -     | -                 | -     | -                | -     | -              | -     | 17.4             | 1.2%   |
|                                      | Cefpodoxime proxetil and clavulanic | 7.5            | 1.2%  | -             | -     | -              | -     | -              | -     | -                 | -     | -                 | -     | -                | -     | -              | -     | 7.5              | 0.5%   |
| Monobactams                          | Aztreonam                           | 0.8            | 0.1%  | -             | -     | -              | -     | -              | -     | -                 | -     | -                 | -     | -                | -     | -              | -     | 0.8              | 0.1%   |
| Macrolides                           | Azithromycin                        | 261.3          | 40.7% | 8.3           | 2.7%  | 54.5           | 33.3% | 39.2           | 45.2% | -                 | -     | 21.0              | 23.4% | -                | -     | 6.7            | 17.1% | 391.0            | 27.7%  |
| Aminoglycosides                      | Gentamicin                          | -              | -     | -             | -     | -              | -     | -              | -     | -                 | -     | -                 | -     | -                | -     | -              | -     | 0.0              | 0.0%   |
| Fluoroquinolones                     | Ofloxacin                           | 14.0           | 2.2%  | -             | -     | 2.5            | 1.5%  | -              | -     | 4.5               | 5.6%  | -                 | -     | -                | -     | -              | -     | 21.0             | 1.5%   |
|                                      | Ciprofloxacin                       | 40.0           | 6.2%  | 3.0           | 1.0%  | 1.2            | 0.7%  | 3.0            | 3.5%  | 19.5              | 24.4% | 5.0               | 5.6%  | -                | -     | -              | -     | 71.7             | 5.1%   |
|                                      | Norfloxacin                         | -              | -     | 54.5          | 18.0% | -              | -     | -              | -     | -                 | -     | -                 | -     | -                | -     | -              | -     | 54.5             | 3.9%   |
|                                      | Levofloxacin                        | -              | -     | -             | -     | -              | -     | 3.0            | 3.5%  | -                 | -     | -                 | -     | -                | -     | -              | -     | 3.0              | 0.2%   |
| Combinations of antibacterials       | Ofloxacin and ornidazole            | 5.0            | 0.8%  | -             | -     | -              | -     | -              | -     | 5.0               | 6.3%  | -                 | -     | -                | -     | -              | -     | 10.1             | 0.7%   |
|                                      | Norfloxacin and tinidazole          | -              | -     | 3.0           | 1.0%  | -              | -     | -              | -     | -                 | -     | -                 | -     | -                | -     | -              | -     | 3.0              | 0.2%   |
|                                      | Cefixime and azithromycin           | -              | -     | -             | -     | 5.0            | 3.1%  | -              | -     | -                 | -     | -                 | -     | -                | -     | -              | -     | 5.0              | 0.4%   |
| Glycopeptide antibacterials          | Vancomycin                          | -              | -     | -             | -     | -              | -     | 1.1            | 1.3%  | -                 | -     | -                 | -     | -                | -     | -              | -     | 1.1              | 0.1%   |
| Imidazole/Nitroimidazole derivatives | Metronidazole                       | 11.2           | 1.7%  | 25.5          | 8.4%  | 6.0            | 3.7%  | -              | -     | 11.0              | 13.8% | 8.8               | 9.8%  | 1.2              | 5.7%  | 3.8            | 9.7%  | 67.5             | 4.8%   |
| Nitrofurantoin derivatives           | Nitrofurantoin                      | -              | -     | 13.5          | 4.5%  | -              | -     | -              | -     | -                 | -     | -                 | -     | -                | -     | -              | -     | 13.5             | 1.0%   |
| Total                                |                                     | 642.1          | 45.0% | 303.1         | 21.3% | 163.7          | 11.5% | 86.6           | 6.1%  | 79.9              | 5.6%  | 89.7              | 6.3%  | 20.9             | 1.5%  | 39.2           | 2.8%  | 1425.3           | 100.0% |

\*including  $\beta$ -lactamase inhibitors

AVI-Acute viral illness, UTI-urinary tract infection, URTI-Upper respiratory tract infection, LRTI-Lower respiratory tract infection, Gastro.-gastroenteritis, Other includes tuberculosis, appendicitis, severe acute malnutrition, rheumatic heart disease, abscess and septic arthritis.
